# Supplementary material for: Smoking Behaviors in Survivors of Smoking-Related and Non–Smoking-Related Cancers
Source: PubMed Central journal article supplement (PMC7333020; doi:10.1001/jamanetworkopen.2020.9072), 2020-07-02
Supplement: jamanetwopen-3-e209072-s001.pdf [file jamanetwopen-3-e209072-s001.pdf]

## Supplementary Online Content

Gritz ER, Talluri R, Fokom Domgue J, Tami-Maury I, Shete S. Smoking behaviors in survivors of smoking-related and non–smoking-related cancers. *JAMA Netw Open*. 2020;3(7):e209072. doi:10.1001/jamanetworkopen.2020.9072

**eTable 1.** Age-Adjusted Prevalence of Daily and Someday Smokers Among Individuals Who Were Current Smokers by Cancer Type: National Health Interview Survey, United States, 2017

**eTable 2:** Average Number of Cigarettes Smoked per Day Among Daily and Someday Smokers Among Individuals Who Were Current Smokers by Cancer Type: National Health Interview Survey, United States, 2017

This supplementary material has been provided by the authors to give readers additional information about their work.

**eTable 1:** Age-Adjusted Prevalence of Daily and Someday Smokers Among Individuals Who Were Current Smokers by Cancer Type: National Health Interview Survey, United States, 2017

| <b>Cancer Type</b>                  | <b>Observed Numbers</b> | <b>Survey Weighted Numbers</b> | <b>Daily Smokers Percentage (95% CI)</b> | <b>Someday Smokers Percentage (95% CI)</b> |
|-------------------------------------|-------------------------|--------------------------------|------------------------------------------|--------------------------------------------|
| <b>All current smokers</b>          | 4015                    | 34284673                       | 75.05 (73.23 - 76.78)                    | 24.95 (23.22 - 26.77)                      |
| <b>Participants with cancer</b>     | 372                     | 2573558                        | 75.19 (63.54 - 84.06)                    | 24.81 (15.94 - 36.46)                      |
| <b>Participants without cancer</b>  | 3637                    | 31679815                       | 74.74 (72.83 - 76.56)                    | 25.26 (23.44 - 27.17)                      |
| <b>Smoking-related cancers</b>      | 145                     | 978888                         | 74.83 (61.67 - 84.6)                     | 25.17 (15.40 - 38.33)                      |
| <b>Non-smoking– related cancers</b> | 251                     | 1738353                        | 79.89 (69.89 - 87.18)                    | 20.11 (12.82 - 30.11)                      |
| <b>Bladder*</b>                     | 15                      | 83946                          | 87.73 (-)                                | 12.27 (-)                                  |
| <b>Blood*</b>                       | 2                       | 10553                          | 49.80 (-)                                | 50.20 (-)                                  |
| <b>Bone</b>                         | 1                       | 3938                           | 100.00 (-)                               | 0.00 (-)                                   |
| <b>Brain</b>                        | 6                       | 47412                          | 83.24 (-)                                | 16.76 (-)                                  |
| <b>Breast</b>                       | 51                      | 358935                         | 86.16 (74.12 - 93.12)                    | 13.84 (6.88 - 25.88)                       |
| <b>Cervix*</b>                      | 56                      | 407523                         | 77.40 (68.4 - 84.41)                     | 22.60 (15.59 - 31.6)                       |
| <b>Colon*</b>                       | 17                      | 99414                          | 43.91 (21.08 - 69.65)                    | 56.09 (30.35 - 78.92)                      |
| <b>Esophagus*</b>                   | 1                       | 3537                           | 100.00 (-)                               | 0.00 (-)                                   |
| <b>Gallbladder</b>                  | 0                       | 0                              | -                                        | -                                          |
| <b>Kidney*</b>                      | 17                      | 126170                         | 96.23 (-)                                | 3.77 (-)                                   |
| <b>Larynx*</b>                      | 0                       | 0                              | -                                        | -                                          |
| <b>Leukemia*</b>                    | 6                       | 42537                          | 64.98 (-)                                | 35.02 (-)                                  |
| <b>Liver*</b>                       | 5                       | 20409                          | 100.00 (-)                               | 0.00 (-)                                   |
| <b>Lung*</b>                        | 15                      | 85594                          | 88.60 (41.75 - 98.83)                    | 11.40 (1.17 - 58.25)                       |
| <b>Lymphoma</b>                     | 4                       | 18207                          | 100.00 (-)                               | 0.00 (-)                                   |
| <b>Melanoma</b>                     | 17                      | 131222                         | 99.28 (57.87 - 99.99)                    | 0.72 (0.01 - 42.13)                        |
| <b>Mouth*</b>                       | 3                       | 28571                          | 79.50 (-)                                | 20.50 (-)                                  |
| <b>Ovary</b>                        | 13                      | 89568                          | 67.01 (14.99 - 95.9)                     | 32.99 (4.10 - 85.01)                       |
| <b>Pancreas*</b>                    | 2                       | 11552                          | 100.00 (-)                               | 0.00 (-)                                   |
| <b>Prostate</b>                     | 42                      | 308265                         | 86.99 (71.1 - 94.78)                     | 13.01 (5.22 - 28.90)                       |
| <b>Rectum*</b>                      | 3                       | 18573                          | 66.93 (-)                                | 33.07 (-)                                  |

|                             |    |        |                       |                       |
|-----------------------------|----|--------|-----------------------|-----------------------|
| <b>Skin1 (non melanoma)</b> | 50 | 333628 | 80.25 (67.93 - 88.62) | 19.75 (11.38 - 32.07) |
| <b>Skin2 (DK kind)</b>      | 29 | 173454 | 79.01 (34.58 - 96.4)  | 20.99 (3.60 - 65.42)  |
| <b>Soft tissue</b>          | 3  | 17570  | 100.00 (-)            | 0.00 (-)              |
| <b>Stomach*</b>             | 6  | 49622  | 52.67 (-)             | 47.33 (-)             |
| <b>Testis</b>               | 2  | 28620  | 68.79 (-)             | 31.21 (-)             |
| <b>Throat*</b>              | 2  | 17917  | 100.00 (-)            | 0.00 (-)              |
| <b>Thyroid</b>              | 8  | 35964  | 87.18 (9.25 - 99.78)  | 12.82 (0.22 - 90.75)  |
| <b>Uterus</b>               | 20 | 139346 | 69.53 (32.37 - 91.58) | 30.47 (8.42 - 67.63)  |
| <b>Other</b>                | 22 | 160640 | 93.67 (47.48 - 99.59) | 6.334 (0.41 - 52.52)  |

\*:Smoking-related cancers; DK: don't know; -: not estimable due to low sample size

**eTable 2:** Average Number of Cigarettes Smoked per Day Among Daily and Someday Smokers Among Individuals Who Were Current Smokers by Cancer Type: National Health Interview Survey, United States, 2017

| Cancer Type                  | Observed Numbers | Survey Weighted Number | Someday Smokers   | Daily Smokers      |
|------------------------------|------------------|------------------------|-------------------|--------------------|
|                              |                  |                        | Mean (SD)         | Mean (SD)          |
| All current smokers          | 4015             | 34284673               | 4.61(4.23-5.00)   | 13.66(13.28-14.04) |
| Participants with cancer     | 372              | 2573558                | 5.23(3.95-6.52)   | 13.56(12.69-14.43) |
| Participants without cancer  | 3637             | 31679815               | 4.58(4.18-4.98)   | 13.66(13.25-14.08) |
| Smoking-related cancers      | 145              | 978888                 | 3.62(2.44-4.8)    | 13.82(12.39-15.26) |
| Non-smoking– related cancers | 251              | 1738353                | 5.62(4-7.24)      | 13.32(12.28-14.36) |
| Bladder*                     | 15               | 83946                  | 4.61(3.95-5.27)   | 11.01(5.80-16.22)  |
| Blood*                       | 2                | 10553                  | 2.00(-)           | 20.00(-)           |
| Bone                         | 1                | 3938                   | -                 | 11.00(-)           |
| Brain                        | 6                | 47412                  | 3.00(-)           | 14.18(9.72-18.63)  |
| Breast                       | 51               | 358935                 | 4.45(3.05-5.86)   | 11.1(8.94-13.25)   |
| Cervix*                      | 56               | 407523                 | 3.72(2.7-4.73)    | 14.18(12.11-16.24) |
| Colon*                       | 17               | 99414                  | 6.26(1.57-10.95)  | 15.05(9.60-20.51)  |
| Esophagus*                   | 1                | 3537                   | -                 | 10.00(-)           |
| Gallbladder                  | 0                | 0                      | -                 | -                  |
| Kidney*                      | 17               | 126170                 | 3.00(-)           | 13.34(9.81-16.87)  |
| Larynx*                      | 0                | 0                      | -                 | -                  |
| Leukemia*                    | 6                | 42537                  | 4.00(-)           | 24.29(16.72-31.85) |
| Liver*                       | 5                | 20409                  | -                 | 9.12(3.62-14.61)   |
| Lung*                        | 15               | 85594                  | 1.87(1.09-2.65)   | 10.51(7.49-13.54)  |
| Lymphoma                     | 4                | 18207                  | -                 | 13.84(9.44-18.24)  |
| Melanoma                     | 17               | 131222                 | 2.00(-)           | 14.93(10.25-19.6)  |
| Mouth*                       | 3                | 28571                  | 2.00(-)           | 13.97(9.21-18.74)  |
| Ovary                        | 13               | 89568                  | 4.28(3.88-4.67)   | 11.29(8.52-14.05)  |
| Pancreas*                    | 2                | 11552                  | -                 | 24.04(3.33-44.74)  |
| Prostate                     | 42               | 308265                 | 5.35(3.25-7.45)   | 12.53(9.48-15.58)  |
| Rectum*                      | 3                | 18573                  | 3.00(-)           | 7.12(2.41-11.82)   |
| Skin1 (non melanoma)         | 50               | 333628                 | 5.42(2.56-8.28)   | 12.12(10.07-14.16) |
| Skin2 (DK kind)              | 29               | 173454                 | 6.05(3.66-8.43)   | 15.36(11.79-18.93) |
| Soft tissue                  | 3                | 17570                  | -                 | 9.24(7.74-10.73)   |
| Stomach*                     | 6                | 49622                  | 2.00(-)           | 10.00(-)           |
| Testis                       | 2                | 28620                  | 4.00(-)           | 15.00(-)           |
| Throat*                      | 2                | 17917                  | -                 | 15.39(8.51-22.28)  |
| Thyroid                      | 8                | 35964                  | 5.00(-)           | 12.58(6.07-19.09)  |
| Uterus                       | 20               | 139346                 | 14.49(0.49-28.49) | 14.18(10.47-17.88) |
| Other                        | 22               | 160640                 | 3.00(-)           | 15.69(13.19-18.19) |

\*:Smoking-related cancers; DK: don't know; -: not estimable due to low sample size
